# Supplementary figures and images for: Enhanced activation of peroxymonosulfate by multivariate Zn x Co y -ZIF for efficient pharmaceutical degradation in water
Source: Royal Society of Chemistry journal article supplement (doi:10.1039/d5cy00790a), 2025-01-01

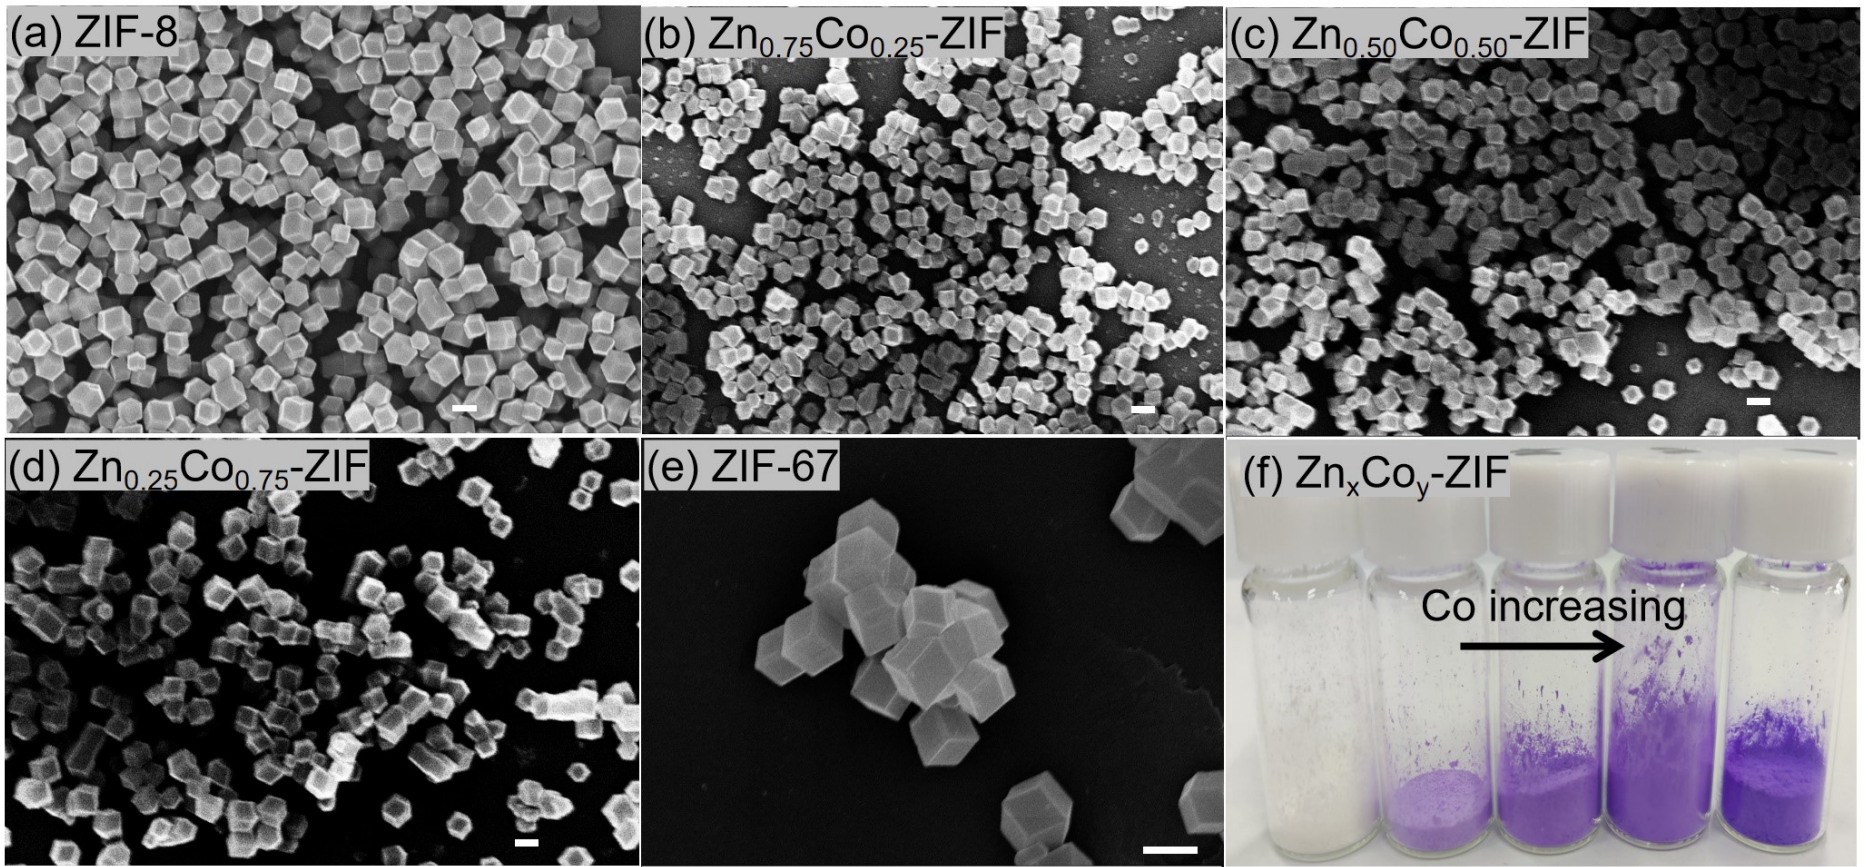

Supplement: d5cy00790a2.pdf [file d5cy00790a2.pdf]

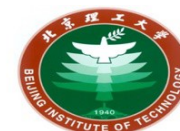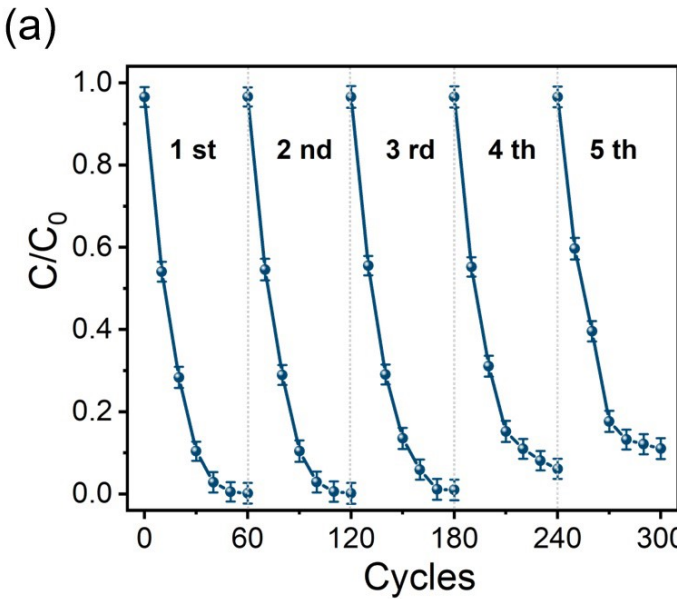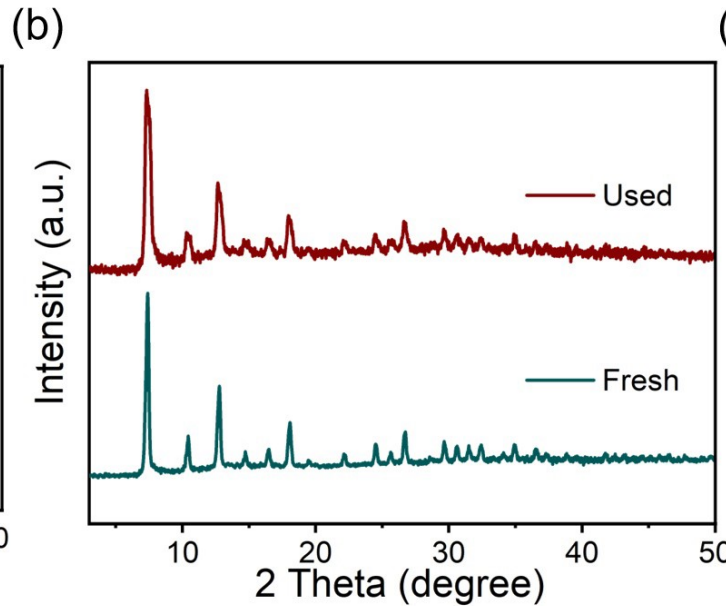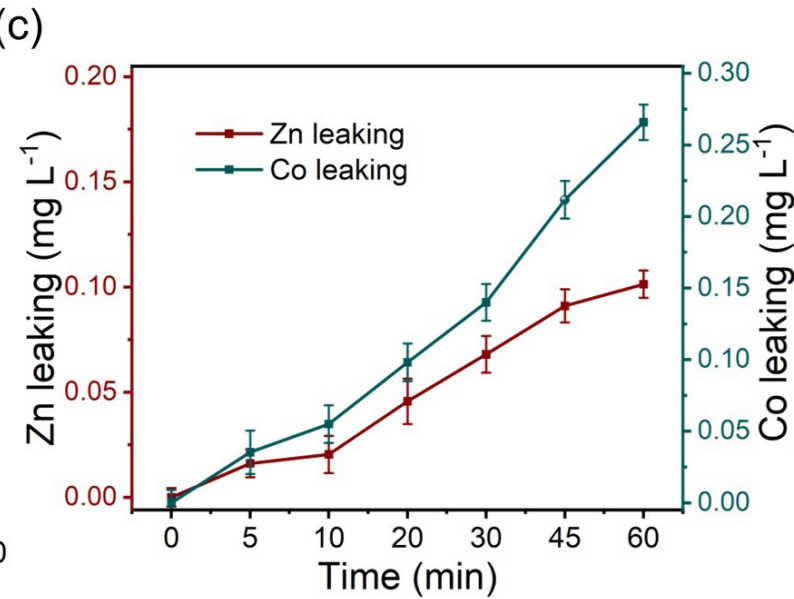

Supplement: d5cy00790a5.pdf [file d5cy00790a5.pdf]
